# Supplementary material for: Early postoperative hypoalbuminaemia is associated with pleural effusion after donor hepatectomy: A propensity score analysis of 2316 donors
Source: PubMed Central journal article supplement (PMC6391412; doi:10.1038/s41598-019-39126-0), 2019-02-26
Supplement: 41598_2019_39126_MOESM1_ESM.pdf [file 41598_2019_39126_MOESM1_ESM.pdf]

# Supplementary Materials

## **Early postoperative hypoalbuminemia is associated with pleural effusion after donor hepatectomy: A propensity score analysis of 2316 donors**

Hye-Won Jeong, Jung-Won Kim, Won-Jung Shin, Seon-Ok Kim, Young-Jin Moon, Hye-Mee Kwon, Kyeo-Woon Jung, In-Gu Jun, Jun-Gol Song, Gyu-Sam Hwang

### **Contents**

**Supplementary Table S1.** Baseline characteristics and intraoperative data of unmatched and propensity score matched donors from 2010 to 2014

**Supplementary Table S2.** Outcomes stratified by the use of albumin solution during donor hepatectomy

**Supplementary Table S1. Baseline characteristics and intraoperative data of unmatched and propensity score matched donors from 2010 to 2014**

| Variables                            | Unmatched (n = 986)         |                                |                         | Propensity score matched (n = 386) |                                |         | Standardized difference |
|--------------------------------------|-----------------------------|--------------------------------|-------------------------|------------------------------------|--------------------------------|---------|-------------------------|
|                                      | Synthetic colloid (n = 730) | 20% albumin solution (n = 256) | Standardized difference | Synthetic colloid (n = 193)        | 20% albumin solution (n = 193) | P-value |                         |
| <b>Preoperative variables</b>        |                             |                                |                         |                                    |                                |         |                         |
| Age (years)                          | 27.2 ± 7.6                  | 28.5 ± 9.1                     | 0.137                   | 27.9 ± 7.8                         | 27.6 ± 8.1                     | 0.755   | 0.027                   |
| Sex, male                            | 530 (72.6%)                 | 171 (66.8%)                    | 0.123                   | 137 (71.0%)                        | 132 (68.4%)                    | 0.635   | 0.055                   |
| BMI (kg/m <sup>2</sup> )             | 22.8 ± 2.8                  | 23.0 ± 3.0                     | 0.061                   | 22.7 ± 2.9                         | 22.8 ± 2.9                     | 0.666   | 0.044                   |
| Haemoglobin (g/dL)                   | 14.6 ± 1.5                  | 14.6 ± 1.4                     | 0.007                   | 14.6 ± 1.5                         | 14.6 ± 1.4                     | 0.928   | 0.009                   |
| Platelet count (×10 <sup>9</sup> /L) | 243.0 ± 48.5                | 240.3 ± 49.1                   | 0.056                   | 239.7 ± 53.4                       | 241.2 ± 46.4                   | 0.770   | 0.031                   |
| PT (INR)                             | 1.00 ± 0.06                 | 1.00 ± 0.06                    | 0.022                   | 1.00 ± 0.06                        | 0.99 ± 0.06                    | 0.602   | 0.051                   |
| Creatinine (mg/dL)                   | 0.8 ± 0.2                   | 0.8 ± 0.2                      | 0.164                   | 0.8 ± 0.2                          | 0.8 ± 0.2                      | 0.751   | 0.030                   |
| Albumin (g/dL)                       | 4.4 ± 0.3                   | 4.3 ± 0.4                      | 0.277                   | 4.4 ± 0.3                          | 4.3 ± 0.3                      | 0.836   | 0.018                   |
| Total bilirubin (mg/dL)              | 0.9 ± 0.4                   | 0.7 ± 0.3                      | 0.501                   | 0.8 ± 0.3                          | 0.7 ± 0.3                      | 0.541   | 0.057                   |
| AST (IU/L)                           | 19.5 ± 5.7                  | 17.9 ± 4.8                     | 0.335                   | 18.0 ± 4.1                         | 18.3 ± 4.9                     | 0.554   | 0.059                   |
| ALT (IU/L)                           | 17.5 ± 9.5                  | 16.5 ± 9.3                     | 0.110                   | 16.5 ± 7.4                         | 16.8 ± 9.9                     | 0.833   | 0.029                   |
| <b>Intraoperative variables</b>      |                             |                                |                         |                                    |                                |         |                         |
| Anaesthetic time (min)               | 450.1 ± 69.6                | 444.8 ± 75.2                   | 0.070                   | 446.8 ± 67.4                       | 442.8 ± 75.4                   | 0.573   | 0.053                   |
| Right hepatectomy                    | 689 (94.4%)                 | 213 (83.2%)                    | 0.299                   | 172 (89.1%)                        | 170 (88.1%)                    | 0.868   | 0.028                   |
| Crystalloid (L)                      | 2942.1 ± 701.9              | 3131.8 ± 833.3                 | 0.228                   | 2983.4 ± 765.8                     | 3032.5 ± 734.8                 | 0.513   | 0.059                   |
| Synthetic colloid (mL)               | 569.7 ± 220.6               | 0.0 ± 0.0                      |                         |                                    |                                |         |                         |
| 20% albumin solution (mL)            | 0.0 ± 0.0                   | 200.9 ± 21.9                   |                         |                                    |                                |         |                         |
| Urine output (mL)                    | 649.7 ± 323.2               | 741.3 ± 403.5                  | 0.227                   | 694.9 ± 353.1                      | 724.3 ± 400.7                  | 0.469   | 0.073                   |
| Diuretics use                        | 166 (22.7%)                 | 95 (37.1%)                     | 0.297                   | 69 (35.8%)                         | 68 (35.2%)                     | 1.000   | 0.011                   |

|               |             |            |       |            |            |       |       |
|---------------|-------------|------------|-------|------------|------------|-------|-------|
| Ephedrine use | 200 (27.4%) | 87 (34.0%) | 0.139 | 65 (33.7%) | 61 (31.6%) | 0.749 | 0.044 |
| Transfusion   | 1 (0.1%)    | 0 (0.0%)   | 0.052 | 0 (0.0%)   | 0 (0.0%)   |       |       |

---

Values are expressed as mean  $\pm$  standard deviation, or number of donors (%), as appropriate.

Abbreviations: BMI, body mass index; PT, prothrombin time; INR, international normalized ratio; AST, aspartate aminotransferase; ALT, alanine transaminase.

## Supplementary Table S2. Outcomes stratified by the use of albumin solution during donor hepatectomy

|                     | Type of colloids  | Unadjusted |      |           |                 | Multivariable adjusted <sup>a</sup> |           |                 | Propensity score-matched |      |           |                 |
|---------------------|-------------------|------------|------|-----------|-----------------|-------------------------------------|-----------|-----------------|--------------------------|------|-----------|-----------------|
|                     |                   | Event/n    | OR   | 95% CI    | <i>P</i> -value | OR                                  | 95% CI    | <i>P</i> -value | Event/n                  | OR   | 95% CI    | <i>P</i> -value |
| Pleural effusion    | Albumin solution  | 83/256     | 0.63 | 0.46–0.84 | 0.002           | 0.55                                | 0.39–0.77 | <0.001          | 55/193                   | 0.61 | 0.41–0.92 | 0.018           |
|                     | Synthetic colloid | 317/730    | 1    |           |                 | 1                                   |           |                 | 76/193                   | 1    |           |                 |
| Acute kidney injury | Albumin solution  | 1/256      | 0.16 | 0.02–1.17 | 0.070           |                                     |           |                 | 1/193                    | 0.16 | 0.02–1.37 | 0.095           |
|                     | Synthetic colloid | 18/730     | 1    |           |                 |                                     |           |                 | 6/193                    | 1    |           |                 |

<sup>a</sup>Adjusted by all variables in Supplementary Table S1 except albumin solution and synthetic colloid.

Abbreviations: OR, odds ratio; CI, confidence interval.
